# Supplementary material
Source: publisher figshare collection journal article supplement (https://asha.figshare.com/articles/dataset/_/16828630)
Supplement: Supplementary file 2 [file 1]

### Supplemental Material S3. Posterior predictive check for Model 2.

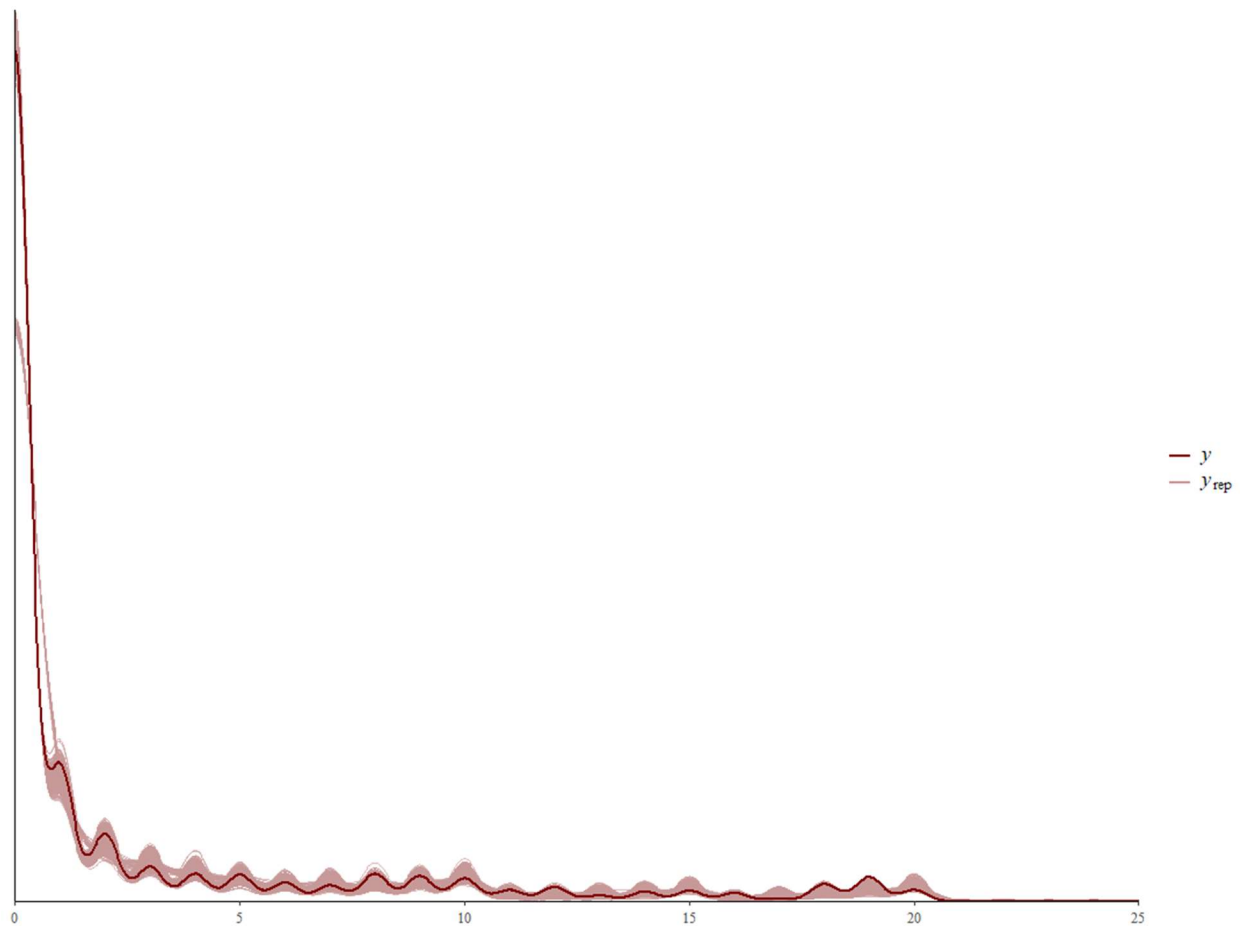

*Note.* This posterior predictive check plots the observed (dark red) and simulated (light red) number of correct responses. The  $x$ -axis is the number of correct responses and the  $y$ -axis is the frequency in which the number of correct responses were observed.
