# Supplementary material
Source: publisher figshare collection journal article supplement (https://asha.figshare.com/articles/dataset/_/16828630)
Supplement: Supplementary file 3 [file 1]

### Supplemental Material S7. Posterior predictive $p$ -values.

|         | Mean | Standard Deviation | Kurtosis |
|---------|------|--------------------|----------|
| Model 1 | 0.50 | 0.32               | 0.92     |
| Model 2 | 0.52 | 0.33               | 0.64     |
| Model 3 | 0.54 | 0.22               | 0.67     |
| Model 4 | 0.49 | 0.29               | 0.65     |
| Model 5 | 0.49 | 0.36               | 0.90     |

The posterior predictive  $p$ -values revealed that the models accurately estimated the *mean* number of successes compared to the observed data. The posterior predictive  $p$ -values for *standard deviation* suggest that the models underestimated the standard deviation of the number of successes compared to the observed data. The posterior predictive  $p$ -values for *kurtosis* for Models 1 and 5 suggests that 90% of the distributions from the simulated outcomes had heavier tails when compared to the observed data. For Models 2, 3, and 4, roughly 60% of the simulated distributions had heavier tails than the observed data.
