# Supplementary material
Source: publisher figshare collection journal article supplement (https://asha.figshare.com/articles/dataset/_/16828630)

## Supplemental Material S8. Generalization patterns of all sentence types.

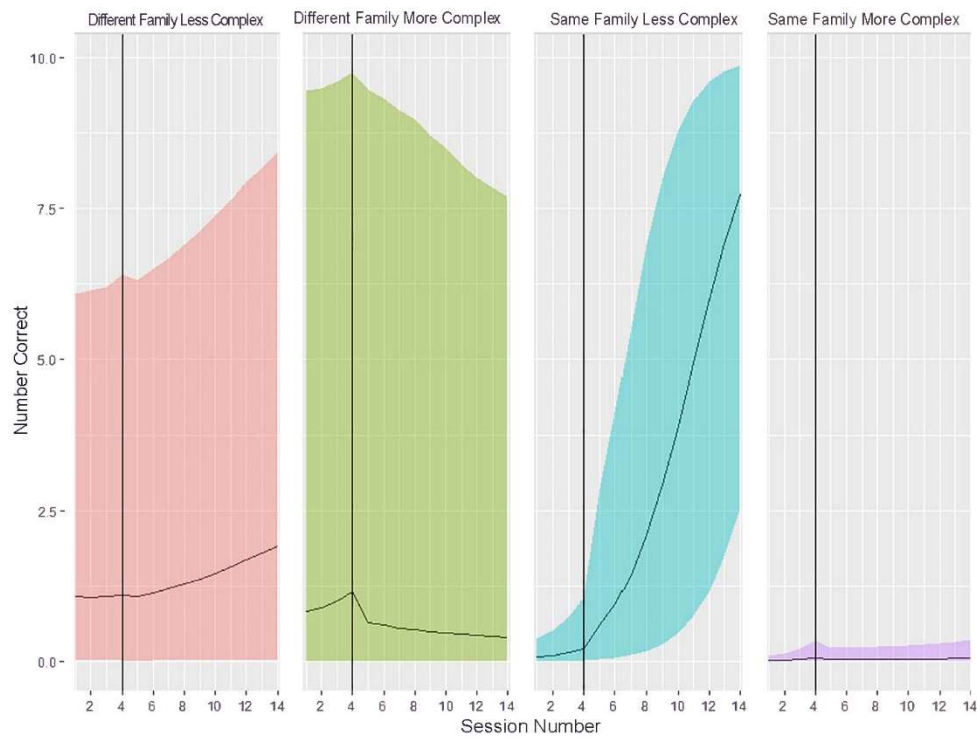

Supplement: Supplementary file 1 [file 1]
